# Supplementary material for: Identification of Genes Involved in Low Temperature-Induced Senescence of Panicle Leaf in Litchi chinensis
Source: MDPI journal article supplement (doi:10.3390/genes10020111), 2019-02-01
Supplement: s1 [file s1]

Table S1. Primer sequences of the reference and candidate genes for qRT-PCR.

| Homology<br>gene | gene ID               | Sequence F (5'→3')       | Sequence R (5'→3')      |
|------------------|-----------------------|--------------------------|-------------------------|
| <i>Actin</i>     |                       | AGTTTGGTTGATGTGGGAGAC    | TGGCTGAACCCGAGATGAT     |
| <i>AGP31</i>     | Litchi_GLEAN_10038709 | AAAAGCCCTAGCCCATACCGAC   | GCTGACTCCACCATGCAAATCA  |
| <i>AHP</i>       | Litchi_GLEAN_10002497 | GGTTTTGGATGGACAGTTTTTACA | TCTTTTGTGCCCTATGCTTGAG  |
| <i>IAA27</i>     | Litchi_GLEAN_10035463 | TGTTCTCTCTGCTGATACCAATG  | GGCACCCTCCATACTGACTTTG  |
| <i>LHY</i>       | Litchi_GLEAN_10002826 | GCGGGAGCGATGGACAGAGG     | TTGGGGCGTGGTGGTGAAT     |
| <i>NAC002-1</i>  | Litchi_GLEAN_10035859 | TGGAAGCGGGTACTGGAAGG     | AAGAGGCAGACGCAGAGCGA    |
| <i>NAC002-2</i>  | Litchi_GLEAN_10030627 | TAAGGCTGGATGATTGGGTGC    | TAGGATTTGGTGGCATGGCA    |
| <i>PEX5</i>      | Litchi_GLEAN_10007023 | CACCAGAATCAAATCCCACCTC   | GCCTTCAGACAAATCCAAGCAA  |
| <i>RAP2-3</i>    | Litchi_GLEAN_10034724 | ACTGCTGAAGAAGCCGCCAA     | AGCCCCATACCCTCCAAACT    |
| <i>WRKY23</i>    | Litchi_GLEAN_10034637 | TGGAATCTCTGAGTTGTGAATC   | CGAATCTCGGCTCTCTCTGTCT  |
| <i>WRKY70</i>    | Litchi_GLEAN_10031581 | TAAGGGGAGGAGAGTTGTGTACA  | TGTGGGTTGTCTTCCATTTTTTG |
| <i>VTC2</i>      | Litchi_GLEAN_10017404 | CTCCCACCAAGAAGATAACCAC   | TCCACAATCAGAAATGAGCACA  |
| <i>MYB32</i>     | Litchi_GLEAN_10038304 | ACAGCCCTCGCTTAGATC       | AGCCTGAAGTGGGTAGTG      |

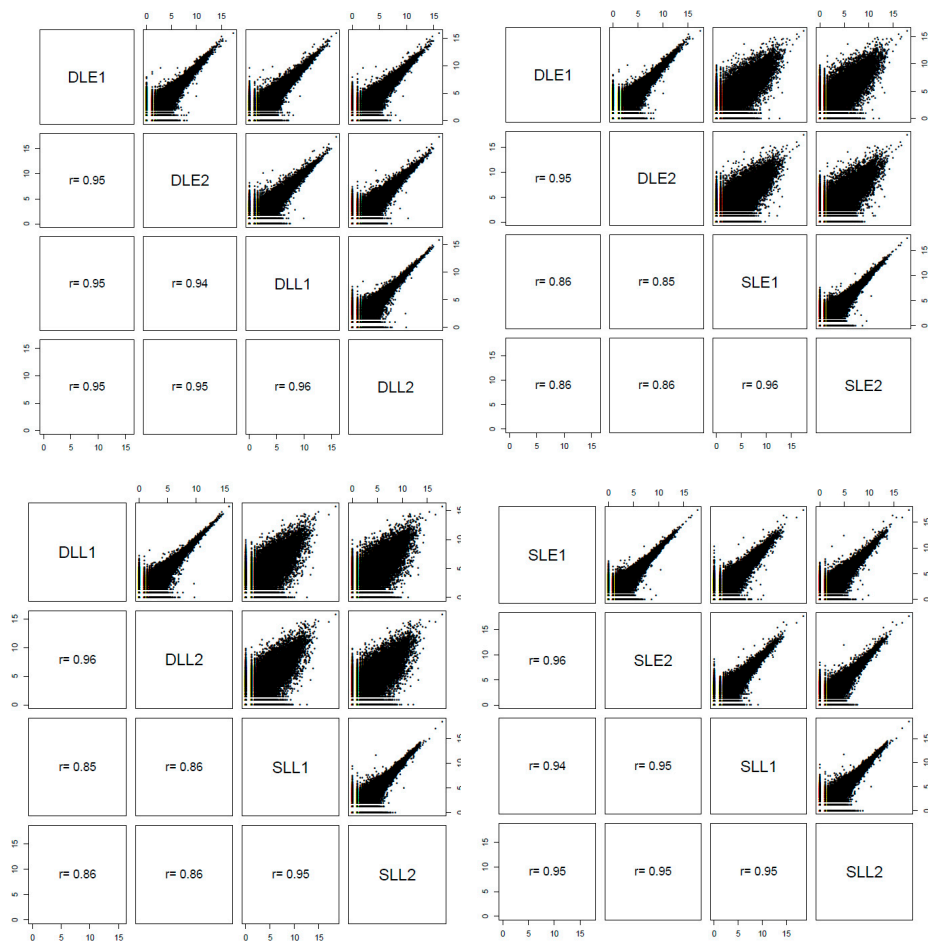

Figure S1. Correlation analysis of the sequencing samples

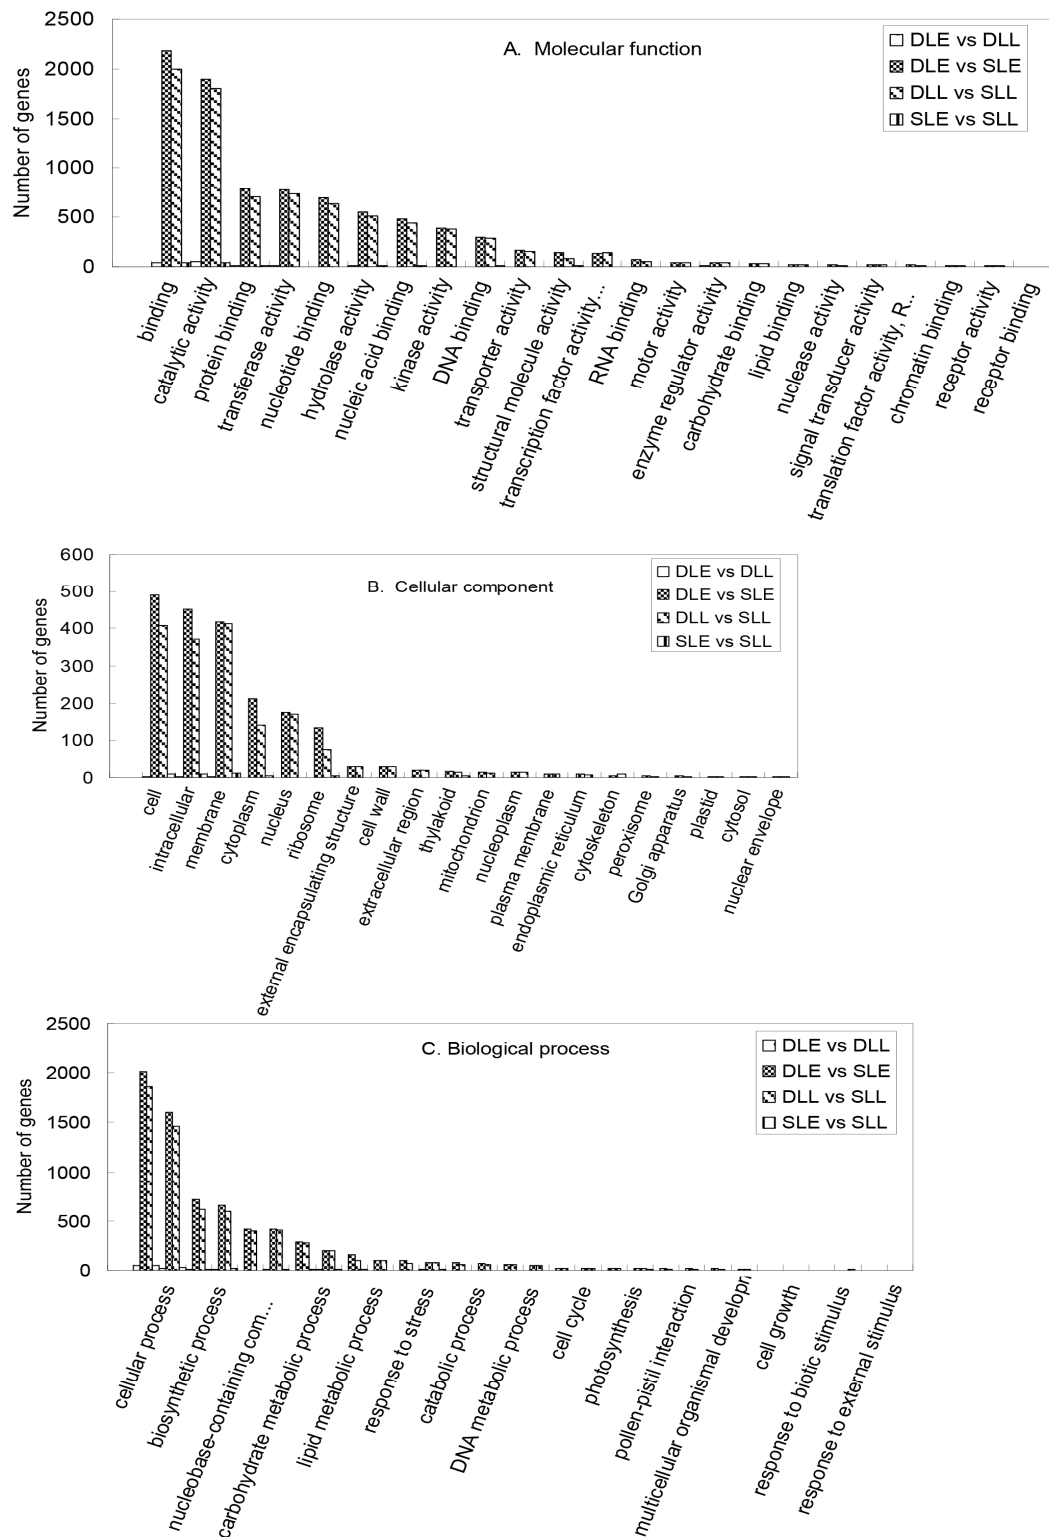

Figure S2. Gene ontology analysis of differentially expressed genes in the panicle leaves  
A: molecular function; B: cellular component; C: biological process.

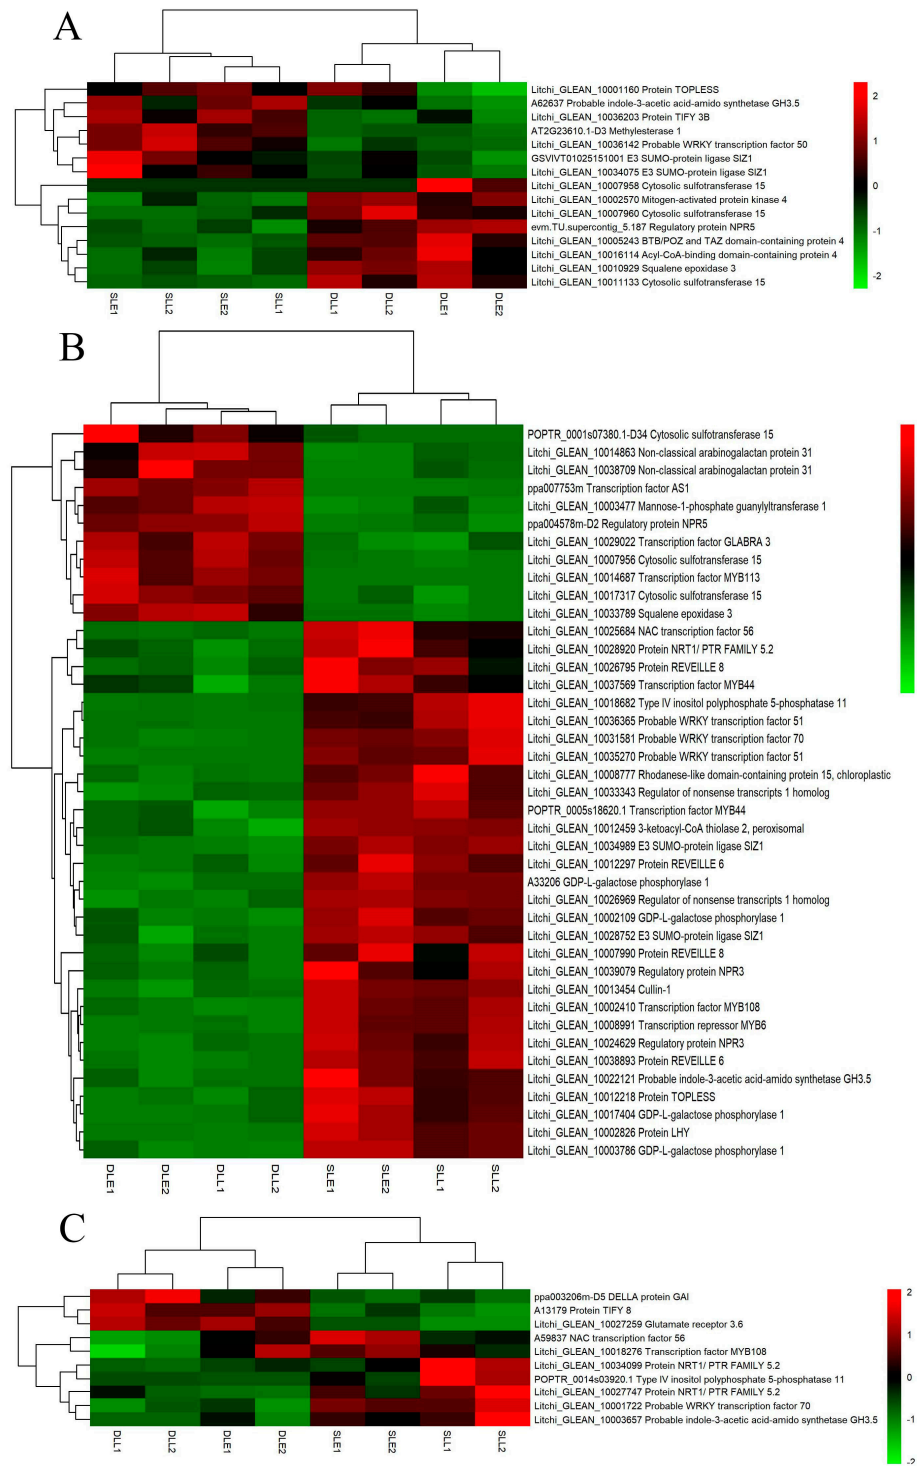

Figure S3. Heat map diagram showing the JA related differentially expressed genes (DEGs) between senescing and developing panicle leaves. A, the unique DEGs expressed at an early stage. B, the DEGs simultaneously expressed at early and later stages. C, the unique DEGs expressed at a later stage. DLE, developing leaves at the early stage. DLL, developing leaves at the later stage. SLE, senescing leaves at the early stage. SLL, senescing leaves at the later stage.

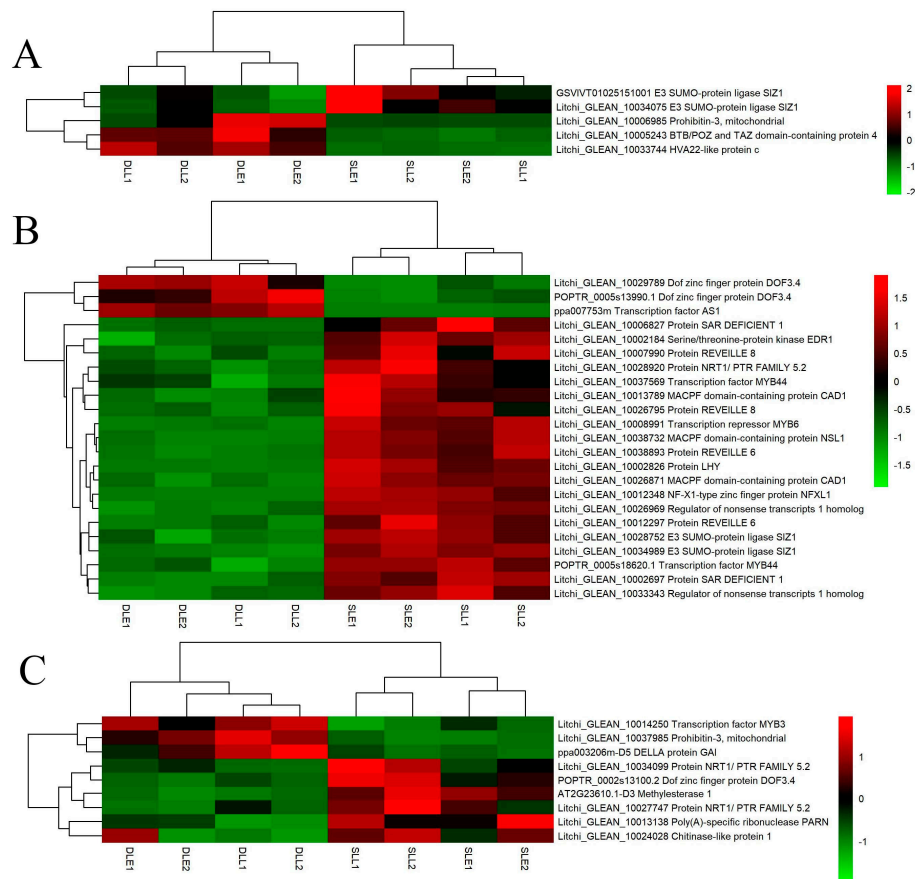

Figure S4. Heat map diagram showing the SA related differentially expressed genes (DEGs) between senescing and developing panicle leaves. A, the unique DEGs expressed at an early stage. B, the DEGs simultaneously expressed at early and later stages. C, the unique DEGs expressed at a later stage. DLE, developing leaves at the early stage. DLL, developing leaves at the later stage. SLE, senescing leaves at the early stage. SLL, senescing leaves at the later stage.

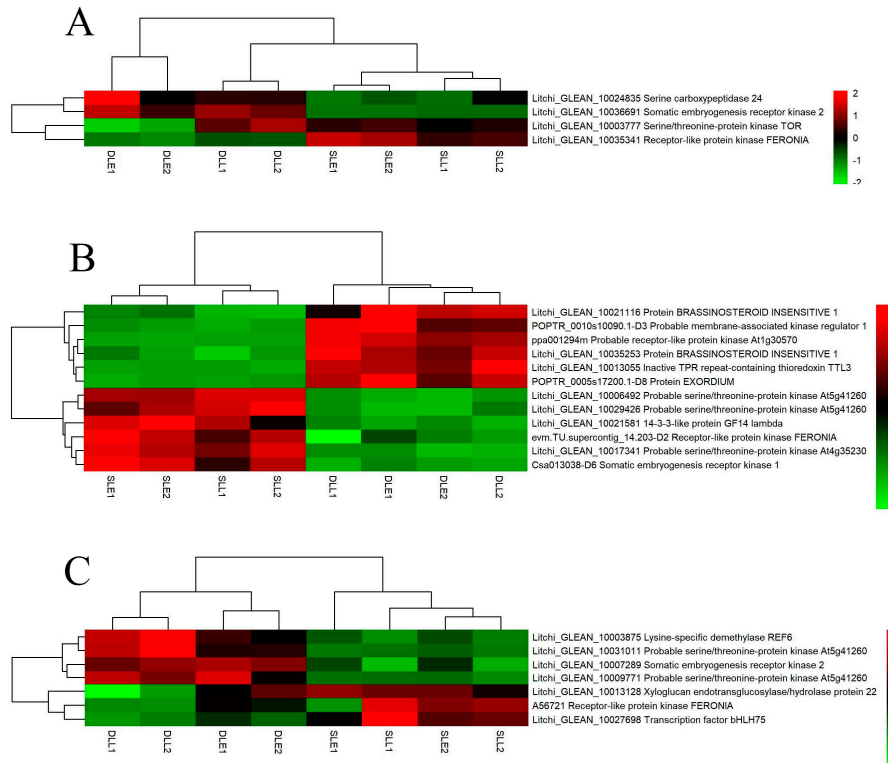

Figure S5. Heat map diagram showing the BR related differentially expressed genes (DEGs) between senescing and developing panicle leaves. A, the unique DEGs expressed at an early stage. B, the DEGs simultaneously expressed at early and later stages. C, the unique DEGs expressed at a later stage. DLE, developing leaves at the early stage. DLL, developing leaves at the later stage. SLE, senescing leaves at the early stage. SLL, senescing leaves at the later stage.
